# Supplementary material for: One step room temperature synthesis of ordered mesoporous silicaSBA-15 mediated by cellulose nanoparticles
Source: Royal Society of Chemistry journal article supplement (doi:10.1039/b916039f), 2009-11-02
Supplement: b916039f.pdf [file b916039f.pdf]

## Supplementary Information

### One step room temperature synthesis of ordered mesoporous silica SBA-15 mediated by cellulose nanoparticles

Catherine Lawrence, Wim Thielemans, and Robert Mokaya

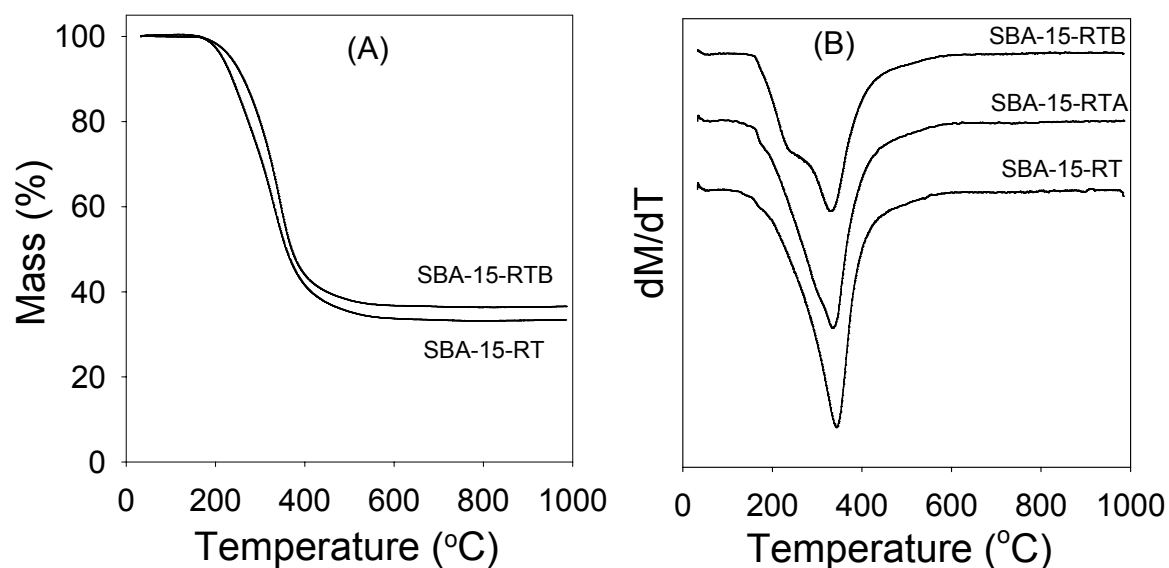

Supporting Figure 1. TGA curves (A) and corresponding DTG profiles of as-synthesised mesoporous silica SBA-15 mesophases prepared at room temperature. The TGA curves were obtained during heating under a nitrogen atmosphere.

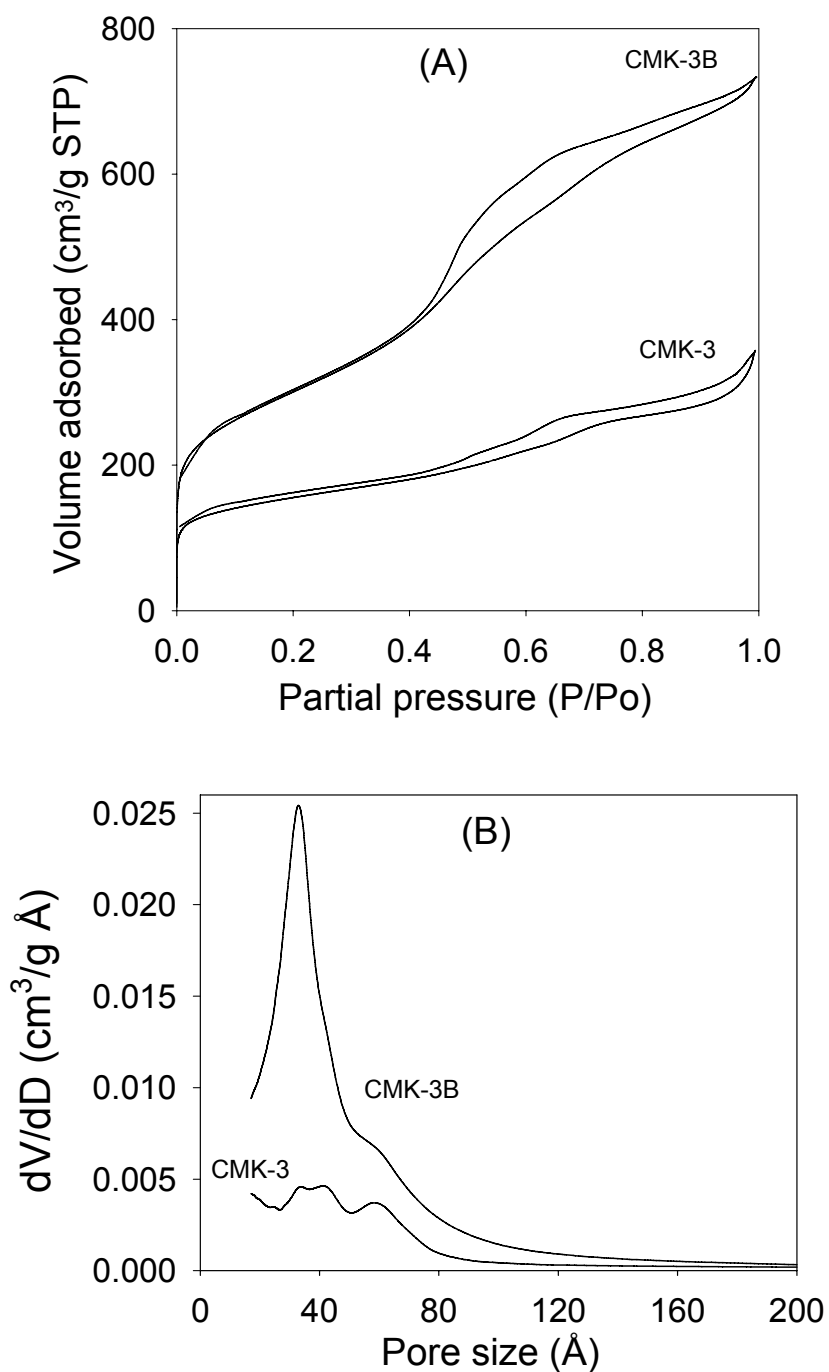

Supporting Figure 2. Nitrogen sorption isotherms (A) and corresponding pore size distribution curves (B) of mesoporous carbon materials templated by mesoporous silica SBA-15 silica prepared at room temperature; CMK-3 was templated by SBA-15-RT, and CMK-3B by SBA-15-RTB.

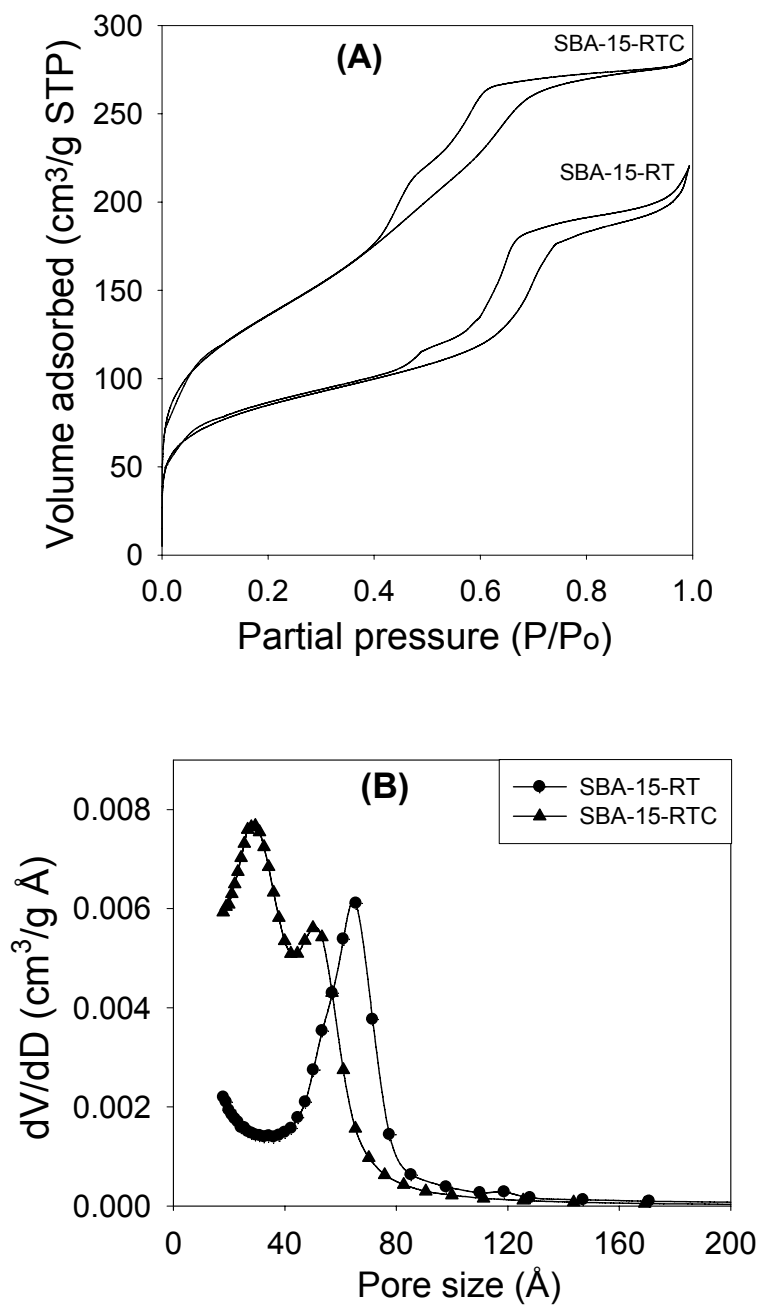

Supporting Figure 3. Nitrogen sorption isotherms (A) and corresponding pore size distribution curves (B) of mesoporous silica SBA-15-RTC prepared at room temperature with 50 wt% cellulose added. The isotherms and PSD curve of the conventional sample (SBA-15-RT) prepared with no cellulose is shown for comparison.

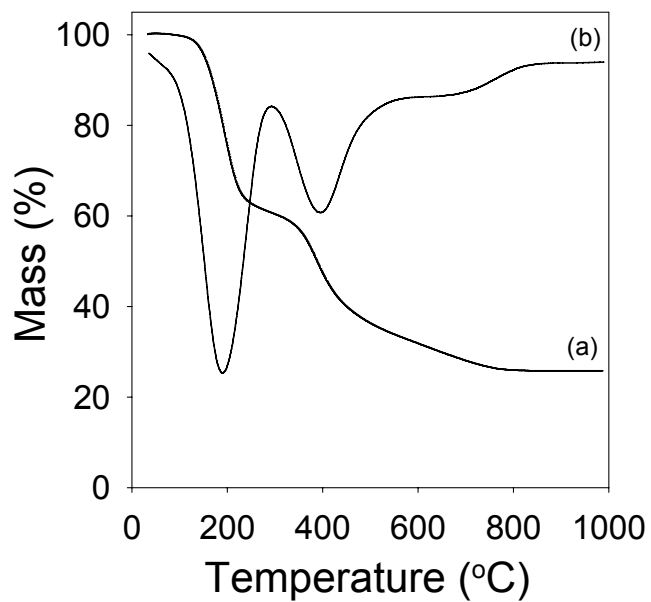

Supporting Figure 4. TGA curve (a) and corresponding DTG profile (b) of as-synthesised mesoporous silica SBA-15-RTC mesophases prepared at room temperature with 50 wt% cellulose added. The TGA curves were obtained during heating under a nitrogen atmosphere.
